# Supplementary material for: White Matter Survival within and around the Hematoma: Quantification by MRI in Patients with Intracerebral Hemorrhage
Source: MDPI journal article supplement (doi:10.3390/biom11060910), 2021-06-18
Supplement: s1 [file s1]

**Supplementary Table S1.** Linear mixed-effects model results.

| Variable                                       | Model 1: Location   |         | Model 2: Location + Time |         | Model 3: Location * Time Interaction |         |
|------------------------------------------------|---------------------|---------|--------------------------|---------|--------------------------------------|---------|
|                                                | B [95% CI]          | p       | B [95% CI]               | p       | B [95% CI]                           | p       |
| Intercept                                      | 5.74                | ---     | 4.56                     | ---     | 3.65                                 | ---     |
| Location*                                      |                     | <0.0001 |                          | <0.0001 |                                      | <0.0001 |
| Contralateral sphere vs. lesion                | 11.57 [9.76, 13.38] | <0.0001 | 11.57 [9.83, 13.31]      | <0.0001 | 13.18 [10.29, 16.07]                 | <0.0001 |
| Ipsilateral sphere vs. lesion                  | 3.56 [1.75, 5.36]   | 0.0002  | 3.56 [1.81, 5.30]        | 0.0001  | 4.70 [1.81, 7.59]                    | 0.0017  |
| Peri-lesion vs. lesion                         | 4.55 [2.75, 6.36]   | <0.0001 | 4.55 [2.81, 6.30]        | <0.0001 | 5.46 [2.56, 8.35]                    | 0.0003  |
| Day                                            |                     | ---     |                          | 0.0053  |                                      | 0.0056  |
| 14 vs. 3                                       | ---                 | ---     | 1.43 [-0.18, 3.04]       | 0.0806  | 3.70 [0.66, 6.73]                    | 0.0174  |
| 30 vs. 3                                       | ---                 | ---     | 2.81 [1.13, 4.48]        | 0.0012  | 3.33 [0.20, 6.46]                    | 0.0372  |
| Location*day (interaction)                     |                     | ---     |                          | ---     |                                      | 0.5222  |
| Contralateral sphere vs. lesion * day 14       | ---                 | ---     | ---                      | ---     | -3.11 [-7.30, 1.09]                  | 0.1446  |
| Contralateral sphere vs. lesion * day 30       | ---                 | ---     | ---                      | ---     | -1.91 [-6.22, 2.41]                  | 0.3824  |
| Ipsilateral sphere vs. lesion * day 14         | ---                 | ---     | ---                      | ---     | -2.71 [-6.90, 1.48]                  | 0.2030  |
| Ipsilateral sphere vs. lesion * day 30         | ---                 | ---     | ---                      | ---     | -0.81 [-5.12, 3.51]                  | 0.7116  |
| Peri-lesion vs. lesion * day 14                | ---                 | ---     | ---                      | ---     | -3.25 [-7.44, 0.94]                  | 0.1271  |
| Peri-lesion vs. lesion * day 30                | ---                 | ---     | ---                      | ---     | 0.60 [-3.71, 4.91]                   | 0.7822  |
| Random effects (variance components structure) |                     |         |                          |         |                                      |         |
| Subject                                        | 11.38 [5.50, 35.93] | ---     | 10.42 [5.04, 32.83]      | ---     | 10.41 [5.03, 32.86]                  | ---     |
| Residual                                       | 12.47 [9.68, 16.68] | ---     | 11.58 [8.97, 15.54]      | ---     | 11.67 [8.97, 15.81]                  | ---     |

\*All pairwise comparisons for location were significant with  $p < 0.0001$  (Bonferroni adjusted threshold for 6 comparisons = 0.008) with the exception of ipsilateral sphere vs. peri-lesion ( $p = 0.26$ ).
